# Supplementary material
Source: publisher figshare collection journal article supplement (https://acs.figshare.com/ndownloader/files/4177834)
Supplement: Supplementary file 1 [file 4177834]

 
data_z 
 
_audit_creation_method            SHELXL-97 
_chemical_name_systematic 
; 
 ? 
; 
_chemical_name_common             ? 
_chemical_melting_point           ? 
_chemical_formula_moiety          ? 
_chemical_formula_sum 
 'C14 H14 Cd N4 O5' 
_chemical_formula_weight          430.69 
 
loop_ 
 _atom_type_symbol 
 _atom_type_description 
 _atom_type_scat_dispersion_real 
 _atom_type_scat_dispersion_imag 
 _atom_type_scat_source 
 'C'  'C'   0.0033   0.0016 
 'International Tables Vol C Tables 4.2.6.8 and 6.1.1.4' 
 'H'  'H'   0.0000   0.0000 
 'International Tables Vol C Tables 4.2.6.8 and 6.1.1.4' 
 'N'  'N'   0.0061   0.0033 
 'International Tables Vol C Tables 4.2.6.8 and 6.1.1.4' 
 'O'  'O'   0.0106   0.0060 
 'International Tables Vol C Tables 4.2.6.8 and 6.1.1.4' 
 'Cd'  'Cd'  -0.8075   1.2024 
 'International Tables Vol C Tables 4.2.6.8 and 6.1.1.4' 
 
_symmetry_cell_setting            Tetragonal 
_symmetry_space_group_name_H-M    I-4 
 
loop_ 
 _symmetry_equiv_pos_as_xyz 
 'x, y, z' 
 'y, -x, -z' 
 '-x, -y, z' 
 '-y, x, -z' 
 'x+1/2, y+1/2, z+1/2' 
 'y+1/2, -x+1/2, -z+1/2' 
 '-x+1/2, -y+1/2, z+1/2' 
 '-y+1/2, x+1/2, -z+1/2' 
 
_cell_length_a                    18.795(12) 
_cell_length_b                    18.795(12) 
_cell_length_c                    9.100(8) 
_cell_angle_alpha                 90.00 
_cell_angle_beta                  90.00 
_cell_angle_gamma                 90.00 
_cell_volume                      3215(4) 
_cell_formula_units_Z             8 
_cell_measurement_temperature     296(2) 
_cell_measurement_reflns_used     ? 
_cell_measurement_theta_min       ? 
_cell_measurement_theta_max       ? 
 
_exptl_crystal_description        ? 
_exptl_crystal_colour             ? 
_exptl_crystal_size_max           0.23 
_exptl_crystal_size_mid           0.21 
_exptl_crystal_size_min           0.18 
_exptl_crystal_density_meas       ? 
_exptl_crystal_density_diffrn     1.780 
_exptl_crystal_density_method     'not measured' 
_exptl_crystal_F_000              1712 
_exptl_absorpt_coefficient_mu     1.391 
_exptl_absorpt_correction_type    Multi-scan 
_exptl_absorpt_correction_T_min   0.733 
_exptl_absorpt_correction_T_max   0.779 
_exptl_absorpt_process_details    ? 
 
_exptl_special_details 
; 
 ? 
; 
 
_diffrn_ambient_temperature       296(2) 
_diffrn_radiation_wavelength      0.71073 
_diffrn_radiation_type            MoK\a 
_diffrn_radiation_source          'fine-focus sealed tube' 
_diffrn_radiation_monochromator   graphite 
_diffrn_measurement_device_type   ? 
_diffrn_measurement_method        ? 
_diffrn_detector_area_resol_mean  ? 
_diffrn_standards_number          ? 
_diffrn_standards_interval_count  ? 
_diffrn_standards_interval_time   ? 
_diffrn_standards_decay_%         ? 
_diffrn_reflns_number             16720 
_diffrn_reflns_av_R_equivalents   0.0780 
_diffrn_reflns_av_sigmaI/netI     0.0487 
_diffrn_reflns_limit_h_min        -24 
_diffrn_reflns_limit_h_max        24 
_diffrn_reflns_limit_k_min        -24 
_diffrn_reflns_limit_k_max        24 
_diffrn_reflns_limit_l_min        -11 
_diffrn_reflns_limit_l_max        11 
_diffrn_reflns_theta_min          3.07 
_diffrn_reflns_theta_max          27.19 
_reflns_number_total              3574 
_reflns_number_gt                 3456 
_reflns_threshold_expression      >2sigma(I) 
 
_computing_data_collection        ? 
_computing_cell_refinement        ? 
_computing_data_reduction         ? 
_computing_structure_solution     'SHELXS-97 (Sheldrick, 1990)' 
_computing_structure_refinement   'SHELXL-97 (Sheldrick, 1997)' 
_computing_molecular_graphics     ? 
_computing_publication_material   ? 
 
_refine_special_details 
; 
 Refinement of F^2^ against ALL reflections.  The weighted R-factor wR and 
 goodness of fit S are based on F^2^, conventional R-factors R are based 
 on F, with F set to zero for negative F^2^. The threshold expression of 
 F^2^ > 2sigma(F^2^) is used only for calculating R-factors(gt) etc. and is 
 not relevant to the choice of reflections for refinement.  R-factors based 
 on F^2^ are statistically about twice as large as those based on F, and R- 
 factors based on ALL data will be even larger. 
; 
 
_refine_ls_structure_factor_coef  Fsqd  
_refine_ls_matrix_type            full 
_refine_ls_weighting_scheme       calc  
_refine_ls_weighting_details 
 'calc w=1/[\s^2^(Fo^2^)+(0.0407P)^2^+0.0000P] where P=(Fo^2^+2Fc^2^)/3' 
_atom_sites_solution_primary      direct 
_atom_sites_solution_secondary    difmap 
_atom_sites_solution_hydrogens    geom 
_refine_ls_hydrogen_treatment     mixed 
_refine_ls_extinction_method      none 
_refine_ls_extinction_coef        ? 
_refine_ls_abs_structure_details 
 'Flack H D (1983), Acta Cryst. A39, 876-881' 
_refine_ls_abs_structure_Flack    0.00(5) 
_refine_ls_number_reflns          3574 
_refine_ls_number_parameters      232 
_refine_ls_number_restraints      3 
_refine_ls_R_factor_all           0.0344 
_refine_ls_R_factor_gt            0.0332 
_refine_ls_wR_factor_ref          0.0827 
_refine_ls_wR_factor_gt           0.0814 
_refine_ls_goodness_of_fit_ref    1.048 
_refine_ls_restrained_S_all       1.049 
_refine_ls_shift/su_max           0.068 
_refine_ls_shift/su_mean          0.003 
 
loop_ 
 _atom_site_label 
 _atom_site_type_symbol 
 _atom_site_fract_x 
 _atom_site_fract_y 
 _atom_site_fract_z 
 _atom_site_U_iso_or_equiv 
 _atom_site_adp_type 
 _atom_site_occupancy 
 _atom_site_symmetry_multiplicity 
 _atom_site_calc_flag 
 _atom_site_refinement_flags 
 _atom_site_disorder_assembly 
 _atom_site_disorder_group 
Cd1 Cd 0.704889(14) 0.148065(14) 0.18152(3) 0.03447(9) Uani 1 1 d . . . 
O4 O 0.36224(15) 0.23737(19) 0.0690(3) 0.0460(7) Uani 1 1 d . . . 
N1 N 0.58642(16) 0.17325(17) 0.2052(4) 0.0348(7) Uani 1 1 d . . . 
N2 N 0.47166(18) 0.19231(19) 0.2554(4) 0.0365(7) Uani 1 1 d . . . 
N3 N 0.80684(18) 0.13596(19) 0.0510(4) 0.0393(7) Uani 1 1 d . . . 
C4 C 0.5355(2) 0.1715(2) 0.3066(5) 0.0369(8) Uani 1 1 d . B . 
O1 O 0.65976(15) 0.18860(18) -0.0571(3) 0.0471(7) Uani 1 1 d . . . 
N4 N 0.87888(18) 0.13336(19) -0.1398(4) 0.0409(8) Uani 1 1 d . . . 
C8 C 0.8146(2) 0.1167(2) -0.0873(4) 0.0369(8) Uani 1 1 d . . . 
H8 H 0.7794 0.0941 -0.1419 0.044 Uiso 1 1 calc R . . 
O2 O 0.56241(17) 0.2217(2) -0.1749(4) 0.0579(9) Uani 1 1 d . . . 
O3 O 0.43626(17) 0.2396(2) -0.1199(3) 0.0572(9) Uani 1 1 d . . . 
C5 C 0.4231(2) 0.2299(2) 0.0158(5) 0.0374(8) Uani 1 1 d . . . 
C3 C 0.4824(2) 0.2073(2) 0.1103(4) 0.0309(7) Uani 1 1 d . . . 
C10 C 0.9152(2) 0.1645(3) -0.0281(7) 0.0575(13) Uani 1 1 d . . . 
H10 H 0.9618 0.1812 -0.0319 0.069 Uiso 1 1 calc R . . 
C2 C 0.5542(2) 0.1948(2) 0.0791(4) 0.0322(7) Uani 1 1 d . . . 
C1 C 0.5949(2) 0.2018(2) -0.0577(4) 0.0382(9) Uani 1 1 d . . . 
C12 C 0.9549(2) 0.0590(2) -0.2967(5) 0.0457(10) Uani 1 1 d . . . 
C9 C 0.8716(3) 0.1670(3) 0.0893(6) 0.0577(13) Uani 1 1 d . . . 
H9 H 0.8827 0.1863 0.1806 0.069 Uiso 1 1 calc R . . 
C14 C 1.0268(3) 0.0676(3) -0.2986(8) 0.0624(14) Uani 1 1 d . . . 
H14 H 1.0459 0.1133 -0.2988 0.075 Uiso 1 1 calc R . . 
C11 C 0.9046(2) 0.1217(3) -0.2891(5) 0.0479(11) Uani 1 1 d . . . 
H11A H 0.9290 0.1641 -0.3231 0.057 Uiso 1 1 calc R . . 
H11B H 0.8645 0.1133 -0.3537 0.057 Uiso 1 1 calc R . . 
C13 C 0.9279(2) -0.0095(3) -0.3002(8) 0.0632(14) Uani 1 1 d . . . 
H13 H 0.8789 -0.0165 -0.3037 0.076 Uiso 1 1 calc R . . 
O5 O 0.74415(17) 0.26685(16) 0.2080(4) 0.0457(7) Uani 1 1 d D . . 
H5A H 0.7404 0.2876 0.1291 0.069 Uiso 1 1 calc RD . . 
C6 C 0.5483(3) 0.1479(4) 0.4622(5) 0.0628(15) Uani 1 1 d . . . 
H6A H 0.5991 0.1492 0.4812 0.075 Uiso 1 1 calc R A 1 
H6B H 0.5259 0.1818 0.5279 0.075 Uiso 1 1 calc R A 1 
C7A C 0.5225(8) 0.0786(8) 0.4961(16) 0.095(5) Uani 0.589(16) 1 d P B 1 
H7AA H 0.5328 0.0678 0.5970 0.142 Uiso 0.589(16) 1 calc PR B 1 
H7AB H 0.5454 0.0443 0.4337 0.142 Uiso 0.589(16) 1 calc PR B 1 
H7AC H 0.4720 0.0770 0.4805 0.142 Uiso 0.589(16) 1 calc PR B 1 
C7B C 0.4880(7) 0.1282(10) 0.5506(13) 0.060(5) Uani 0.411(16) 1 d P B 2 
H7BA H 0.5040 0.1140 0.6464 0.090 Uiso 0.411(16) 1 calc PR B 2 
H7BB H 0.4634 0.0893 0.5048 0.090 Uiso 0.411(16) 1 calc PR B 2 
H7BC H 0.4565 0.1681 0.5597 0.090 Uiso 0.411(16) 1 calc PR B 2 
H5B H 0.7841(17) 0.247(3) 0.220(6) 0.090 Uiso 1 1 d D . . 
 
loop_ 
 _atom_site_aniso_label 
 _atom_site_aniso_U_11 
 _atom_site_aniso_U_22 
 _atom_site_aniso_U_33 
 _atom_site_aniso_U_23 
 _atom_site_aniso_U_13 
 _atom_site_aniso_U_12 
Cd1 0.03516(15) 0.03369(15) 0.03457(14) 0.00281(11) -0.00103(12) 0.00190(11) 
O4 0.0268(13) 0.071(2) 0.0408(15) 0.0184(14) 0.0014(12) 0.0095(13) 
N1 0.0321(15) 0.0373(16) 0.0350(18) 0.0034(13) -0.0038(14) -0.0004(12) 
N2 0.0313(16) 0.048(2) 0.0298(15) 0.0058(14) -0.0004(13) 0.0010(14) 
N3 0.0327(16) 0.0432(18) 0.0421(19) -0.0044(16) -0.0036(15) 0.0024(14) 
C4 0.0342(18) 0.049(2) 0.0274(16) 0.0031(18) -0.0025(16) 0.0004(15) 
O1 0.0337(14) 0.067(2) 0.0407(16) 0.0068(15) 0.0044(13) 0.0033(13) 
N4 0.0358(17) 0.0408(18) 0.046(2) 0.0023(15) 0.0023(14) 0.0044(14) 
C8 0.036(2) 0.040(2) 0.035(2) -0.0028(16) -0.0041(16) 0.0018(16) 
O2 0.0436(16) 0.096(3) 0.0343(15) 0.0211(18) 0.0004(15) 0.0001(16) 
O3 0.0420(17) 0.094(3) 0.0357(16) 0.0246(17) -0.0038(13) 0.0057(17) 
C5 0.0334(18) 0.039(2) 0.039(2) 0.0065(17) -0.0057(16) -0.0007(16) 
C3 0.0302(18) 0.0313(17) 0.0312(18) 0.0038(15) -0.0013(15) -0.0006(14) 
C10 0.033(2) 0.066(3) 0.073(3) -0.014(3) -0.002(2) -0.008(2) 
C2 0.0329(18) 0.0330(18) 0.0306(18) 0.0023(14) 0.0015(15) -0.0017(14) 
C1 0.038(2) 0.045(2) 0.031(2) 0.0084(17) 0.0028(17) -0.0041(17) 
C12 0.048(2) 0.050(2) 0.039(2) 0.0085(19) 0.0027(19) 0.0077(18) 
C9 0.046(3) 0.068(3) 0.060(3) -0.021(3) -0.015(2) 0.000(2) 
C14 0.045(2) 0.049(2) 0.093(4) -0.007(3) 0.001(3) -0.0020(19) 
C11 0.046(2) 0.048(2) 0.050(3) 0.012(2) 0.006(2) 0.0071(19) 
C13 0.037(2) 0.055(3) 0.097(4) 0.011(3) 0.001(3) 0.0004(19) 
O5 0.0532(17) 0.0373(15) 0.047(2) -0.0011(13) 0.0021(14) 0.0026(13) 
C6 0.046(2) 0.108(5) 0.034(2) 0.022(3) -0.002(2) 0.004(3) 
C7A 0.090(9) 0.104(10) 0.090(9) 0.062(8) 0.000(7) -0.002(8) 
C7B 0.052(7) 0.102(11) 0.027(5) 0.016(6) 0.009(5) 0.005(7) 
 
_geom_special_details 
; 
 All esds (except the esd in the dihedral angle between two l.s. planes) 
 are estimated using the full covariance matrix.  The cell esds are taken 
 into account individually in the estimation of esds in distances, angles 
 and torsion angles; correlations between esds in cell parameters are only 
 used when they are defined by crystal symmetry.  An approximate (isotropic) 
 treatment of cell esds is used for estimating esds involving l.s. planes. 
; 
 
loop_ 
 _geom_bond_atom_site_label_1 
 _geom_bond_atom_site_label_2 
 _geom_bond_distance 
 _geom_bond_site_symmetry_2 
 _geom_bond_publ_flag 
Cd1 N3 2.266(4) . ? 
Cd1 N1 2.286(3) . ? 
Cd1 N2 2.334(4) 6 ? 
Cd1 O4 2.359(4) 6 ? 
Cd1 O5 2.364(3) . ? 
Cd1 O1 2.452(4) . ? 
O4 C5 1.249(5) . ? 
O4 Cd1 2.359(4) 8_545 ? 
N1 C4 1.329(5) . ? 
N1 C2 1.359(5) . ? 
N2 C4 1.346(5) . ? 
N2 C3 1.366(5) . ? 
N2 Cd1 2.334(4) 8_545 ? 
N3 C8 1.318(5) . ? 
N3 C9 1.393(5) . ? 
C4 C6 1.503(6) . ? 
O1 C1 1.243(5) . ? 
N4 C8 1.337(5) . ? 
N4 C10 1.358(6) . ? 
N4 C11 1.459(6) . ? 
C8 H8 0.9300 . ? 
O2 C1 1.285(5) . ? 
O3 C5 1.273(5) . ? 
C5 C3 1.471(5) . ? 
C3 C2 1.398(5) . ? 
C10 C9 1.348(8) . ? 
C10 H10 0.9300 . ? 
C2 C1 1.468(5) . ? 
C12 C14 1.362(6) . ? 
C12 C13 1.383(7) . ? 
C12 C11 1.512(6) . ? 
C9 H9 0.9300 . ? 
C14 C13 1.385(7) 3_755 ? 
C14 H14 0.9300 . ? 
C11 H11A 0.9700 . ? 
C11 H11B 0.9700 . ? 
C13 C14 1.385(7) 3_755 ? 
C13 H13 0.9300 . ? 
O5 H5A 0.8200 . ? 
O5 H5B 0.846(10) . ? 
C6 C7A 1.424(14) . ? 
C6 C7B 1.439(13) . ? 
C6 H6A 0.9700 . ? 
C6 H6B 0.9700 . ? 
C7A H7AA 0.9600 . ? 
C7A H7AB 0.9600 . ? 
C7A H7AC 0.9600 . ? 
C7B H7BA 0.9600 . ? 
C7B H7BB 0.9600 . ? 
C7B H7BC 0.9600 . ? 
 
loop_ 
 _geom_angle_atom_site_label_1 
 _geom_angle_atom_site_label_2 
 _geom_angle_atom_site_label_3 
 _geom_angle 
 _geom_angle_site_symmetry_1 
 _geom_angle_site_symmetry_3 
 _geom_angle_publ_flag 
N3 Cd1 N1 153.34(12) . . ? 
N3 Cd1 N2 96.76(13) . 6 ? 
N1 Cd1 N2 94.46(12) . 6 ? 
N3 Cd1 O4 106.10(13) . 6 ? 
N1 Cd1 O4 100.27(12) . 6 ? 
N2 Cd1 O4 73.17(11) 6 6 ? 
N3 Cd1 O5 83.35(12) . . ? 
N1 Cd1 O5 95.68(11) . . ? 
N2 Cd1 O5 156.51(12) 6 . ? 
O4 Cd1 O5 84.19(11) 6 . ? 
N3 Cd1 O1 81.94(12) . . ? 
N1 Cd1 O1 71.48(11) . . ? 
N2 Cd1 O1 118.82(12) 6 . ? 
O4 Cd1 O1 165.27(11) 6 . ? 
O5 Cd1 O1 84.53(12) . . ? 
C5 O4 Cd1 114.7(3) . 8_545 ? 
C4 N1 C2 105.8(3) . . ? 
C4 N1 Cd1 139.5(3) . . ? 
C2 N1 Cd1 114.6(2) . . ? 
C4 N2 C3 105.2(4) . . ? 
C4 N2 Cd1 143.6(3) . 8_545 ? 
C3 N2 Cd1 111.1(3) . 8_545 ? 
C8 N3 C9 104.9(4) . . ? 
C8 N3 Cd1 128.4(3) . . ? 
C9 N3 Cd1 124.4(3) . . ? 
N1 C4 N2 113.2(3) . . ? 
N1 C4 C6 123.1(4) . . ? 
N2 C4 C6 123.7(4) . . ? 
C1 O1 Cd1 113.9(3) . . ? 
C8 N4 C10 106.8(4) . . ? 
C8 N4 C11 126.7(4) . . ? 
C10 N4 C11 126.5(4) . . ? 
N3 C8 N4 112.1(4) . . ? 
N3 C8 H8 123.9 . . ? 
N4 C8 H8 123.9 . . ? 
O4 C5 O3 122.5(4) . . ? 
O4 C5 C3 120.0(4) . . ? 
O3 C5 C3 117.4(4) . . ? 
N2 C3 C2 107.7(3) . . ? 
N2 C3 C5 120.8(4) . . ? 
C2 C3 C5 131.4(4) . . ? 
C9 C10 N4 107.6(4) . . ? 
C9 C10 H10 126.2 . . ? 
N4 C10 H10 126.2 . . ? 
N1 C2 C3 108.0(3) . . ? 
N1 C2 C1 120.7(3) . . ? 
C3 C2 C1 131.3(3) . . ? 
O1 C1 O2 121.9(4) . . ? 
O1 C1 C2 119.3(4) . . ? 
O2 C1 C2 118.8(4) . . ? 
C14 C12 C13 118.3(4) . . ? 
C14 C12 C11 121.8(5) . . ? 
C13 C12 C11 119.8(4) . . ? 
C10 C9 N3 108.6(4) . . ? 
C10 C9 H9 125.7 . . ? 
N3 C9 H9 125.7 . . ? 
C12 C14 C13 121.1(5) . 3_755 ? 
C12 C14 H14 119.5 . . ? 
C13 C14 H14 119.5 3_755 . ? 
N4 C11 C12 111.5(4) . . ? 
N4 C11 H11A 109.3 . . ? 
C12 C11 H11A 109.3 . . ? 
N4 C11 H11B 109.3 . . ? 
C12 C11 H11B 109.3 . . ? 
H11A C11 H11B 108.0 . . ? 
C12 C13 C14 120.5(5) . 3_755 ? 
C12 C13 H13 119.7 . . ? 
C14 C13 H13 119.7 3_755 . ? 
Cd1 O5 H5A 109.5 . . ? 
Cd1 O5 H5B 83(5) . . ? 
H5A O5 H5B 113.4 . . ? 
C7A C6 C7B 51.3(8) . . ? 
C7A C6 C4 114.8(7) . . ? 
C7B C6 C4 118.5(6) . . ? 
C7A C6 H6A 108.6 . . ? 
C7B C6 H6A 132.9 . . ? 
C4 C6 H6A 108.6 . . ? 
C7A C6 H6B 108.6 . . ? 
C7B C6 H6B 58.8 . . ? 
C4 C6 H6B 108.6 . . ? 
H6A C6 H6B 107.5 . . ? 
C6 C7A H7AA 109.5 . . ? 
C6 C7A H7AB 109.5 . . ? 
H7AA C7A H7AB 109.5 . . ? 
C6 C7A H7AC 109.5 . . ? 
H7AA C7A H7AC 109.5 . . ? 
H7AB C7A H7AC 109.5 . . ? 
C6 C7B H7BA 109.5 . . ? 
C6 C7B H7BB 109.5 . . ? 
H7BA C7B H7BB 109.5 . . ? 
C6 C7B H7BC 109.5 . . ? 
H7BA C7B H7BC 109.5 . . ? 
H7BB C7B H7BC 109.5 . . ? 
 
loop_ 
 _geom_torsion_atom_site_label_1 
 _geom_torsion_atom_site_label_2 
 _geom_torsion_atom_site_label_3 
 _geom_torsion_atom_site_label_4 
 _geom_torsion 
 _geom_torsion_site_symmetry_1 
 _geom_torsion_site_symmetry_2 
 _geom_torsion_site_symmetry_3 
 _geom_torsion_site_symmetry_4 
 _geom_torsion_publ_flag 
N3 Cd1 N1 C4 174.4(4) . . . . ? 
N2 Cd1 N1 C4 59.6(4) 6 . . . ? 
O4 Cd1 N1 C4 -14.1(4) 6 . . . ? 
O5 Cd1 N1 C4 -99.2(4) . . . . ? 
O1 Cd1 N1 C4 178.6(4) . . . . ? 
N3 Cd1 N1 C2 -2.7(4) . . . . ? 
N2 Cd1 N1 C2 -117.4(3) 6 . . . ? 
O4 Cd1 N1 C2 168.9(3) 6 . . . ? 
O5 Cd1 N1 C2 83.8(3) . . . . ? 
O1 Cd1 N1 C2 1.5(3) . . . . ? 
N1 Cd1 N3 C8 -31.1(5) . . . . ? 
N2 Cd1 N3 C8 83.2(4) 6 . . . ? 
O4 Cd1 N3 C8 157.6(3) 6 . . . ? 
O5 Cd1 N3 C8 -120.5(4) . . . . ? 
O1 Cd1 N3 C8 -35.1(4) . . . . ? 
N1 Cd1 N3 C9 129.3(4) . . . . ? 
N2 Cd1 N3 C9 -116.4(4) 6 . . . ? 
O4 Cd1 N3 C9 -42.0(4) 6 . . . ? 
O5 Cd1 N3 C9 39.9(4) . . . . ? 
O1 Cd1 N3 C9 125.3(4) . . . . ? 
C2 N1 C4 N2 -1.5(5) . . . . ? 
Cd1 N1 C4 N2 -178.7(3) . . . . ? 
C2 N1 C4 C6 178.1(4) . . . . ? 
Cd1 N1 C4 C6 0.9(7) . . . . ? 
C3 N2 C4 N1 1.1(5) . . . . ? 
Cd1 N2 C4 N1 175.6(3) 8_545 . . . ? 
C3 N2 C4 C6 -178.5(4) . . . . ? 
Cd1 N2 C4 C6 -3.9(8) 8_545 . . . ? 
N3 Cd1 O1 C1 176.1(3) . . . . ? 
N1 Cd1 O1 C1 -2.0(3) . . . . ? 
N2 Cd1 O1 C1 82.8(3) 6 . . . ? 
O4 Cd1 O1 C1 -59.7(6) 6 . . . ? 
O5 Cd1 O1 C1 -99.9(3) . . . . ? 
C9 N3 C8 N4 -0.3(5) . . . . ? 
Cd1 N3 C8 N4 163.1(3) . . . . ? 
C10 N4 C8 N3 0.8(5) . . . . ? 
C11 N4 C8 N3 -178.1(4) . . . . ? 
Cd1 O4 C5 O3 174.3(4) 8_545 . . . ? 
Cd1 O4 C5 C3 -4.1(5) 8_545 . . . ? 
C4 N2 C3 C2 -0.2(4) . . . . ? 
Cd1 N2 C3 C2 -176.8(2) 8_545 . . . ? 
C4 N2 C3 C5 178.0(4) . . . . ? 
Cd1 N2 C3 C5 1.5(5) 8_545 . . . ? 
O4 C5 C3 N2 1.9(6) . . . . ? 
O3 C5 C3 N2 -176.7(4) . . . . ? 
O4 C5 C3 C2 179.7(4) . . . . ? 
O3 C5 C3 C2 1.2(7) . . . . ? 
C8 N4 C10 C9 -0.9(6) . . . . ? 
C11 N4 C10 C9 177.9(4) . . . . ? 
C4 N1 C2 C3 1.3(4) . . . . ? 
Cd1 N1 C2 C3 179.3(2) . . . . ? 
C4 N1 C2 C1 -179.1(3) . . . . ? 
Cd1 N1 C2 C1 -1.1(5) . . . . ? 
N2 C3 C2 N1 -0.6(5) . . . . ? 
C5 C3 C2 N1 -178.7(4) . . . . ? 
N2 C3 C2 C1 179.8(4) . . . . ? 
C5 C3 C2 C1 1.8(8) . . . . ? 
Cd1 O1 C1 O2 -178.0(3) . . . . ? 
Cd1 O1 C1 C2 2.2(5) . . . . ? 
N1 C2 C1 O1 -0.9(6) . . . . ? 
C3 C2 C1 O1 178.7(4) . . . . ? 
N1 C2 C1 O2 179.3(4) . . . . ? 
C3 C2 C1 O2 -1.2(7) . . . . ? 
N4 C10 C9 N3 0.8(6) . . . . ? 
C8 N3 C9 C10 -0.3(6) . . . . ? 
Cd1 N3 C9 C10 -164.5(4) . . . . ? 
C13 C12 C14 C13 -1.6(8) . . . 3_755 ? 
C11 C12 C14 C13 177.7(6) . . . 3_755 ? 
C8 N4 C11 C12 -103.9(5) . . . . ? 
C10 N4 C11 C12 77.5(6) . . . . ? 
C14 C12 C11 N4 -99.5(6) . . . . ? 
C13 C12 C11 N4 79.8(6) . . . . ? 
C14 C12 C13 C14 3.1(8) . . . 3_755 ? 
C11 C12 C13 C14 -176.3(6) . . . 3_755 ? 
N1 C4 C6 C7A -104.5(9) . . . . ? 
N2 C4 C6 C7A 75.1(9) . . . . ? 
N1 C4 C6 C7B -162.2(10) . . . . ? 
N2 C4 C6 C7B 17.3(11) . . . . ? 
 
_diffrn_measured_fraction_theta_max    0.998 
_diffrn_reflns_theta_full              27.19 
_diffrn_measured_fraction_theta_full   0.998 
_refine_diff_density_max    0.997 
_refine_diff_density_min   -0.832 
_refine_diff_density_rms    0.080 
